# Supplementary material for: Magnetic resonance spectroscopy evidence for declining gliosis in MS patients treated with ocrelizumab versus interferon beta-1a
Source: PubMed Central journal article supplement — Mult Scler J Exp Transl Clin. 2019 Oct 15;5(4):2055217319879952. doi: 10.1177/2055217319879952 (PMC6796216; doi:10.1177/2055217319879952), 2019-10-15
Supplement: MSO879952_Supplemental_Material1.pdf [file MSO879952_Supplemental_Material1.pdf]

## MS Journal Appendix for MRI methodology

| Hardware                          |                 |
|-----------------------------------|-----------------|
| Field strength                    | 3.0T            |
| Manufacturer                      | Philips         |
| Model                             | Achieva         |
| Coil type<br>(e.g. head, surface) | SENSE head coil |
| Number of coil channels           | 8               |

| Acquisition sequence                                           |                                                                          |                                        |
|----------------------------------------------------------------|--------------------------------------------------------------------------|----------------------------------------|
| Type<br>(e.g. FLAIR, DIR, DTI, fMRI)                           | Magnetic Resonance Spectroscopy with Point RESolved Spectroscopy (PRESS) |                                        |
| Acquisition time                                               | 4 min 24 sec                                                             |                                        |
| Orientation                                                    | Large supraventricular voxel                                             |                                        |
| Alignment<br>(e.g. anterior commissure/poster commissure line) | See Fig 1                                                                |                                        |
| Voxel size                                                     | $6.5 \times 4.5 \times 1.8 \text{ cm}^3$                                 |                                        |
| TR                                                             | 4000 ms                                                                  |                                        |
| TE                                                             | 36 ms                                                                    |                                        |
| TI                                                             | N/A                                                                      |                                        |
| Flip angle                                                     | 90                                                                       |                                        |
| NEX                                                            | 56                                                                       |                                        |
| Field of view                                                  | N/A                                                                      |                                        |
| Matrix size                                                    | N/A                                                                      |                                        |
| Parallel imaging                                               | Yes                                                                      | <input checked="" type="checkbox"/> No |
| If used, parallel imaging method:<br>(e.g. SENSE, GRAPPA)      |                                                                          |                                        |
| Cardiac gating                                                 | Yes                                                                      | <input checked="" type="checkbox"/> No |
| If used, cardiac gating method:<br>(e.g. PPU or ECG)           |                                                                          |                                        |
| Contrast enhancement                                           | Yes                                                                      | <input checked="" type="checkbox"/> No |

**Acquisition sequence**

If used, provide name of contrast agent, dose and timing of scan post-contrast administration

Other parameters:

8 phase cycle steps  
56 water-suppressed acquisitions  
8 non-water-suppressed acquisitions  
Automated second order pencil-beam shimming

| <b>Image analysis methods and outputs</b>                                                                                                      |                                                                                                                                                                                    |
|------------------------------------------------------------------------------------------------------------------------------------------------|------------------------------------------------------------------------------------------------------------------------------------------------------------------------------------|
| <b>Lesions</b>                                                                                                                                 |                                                                                                                                                                                    |
| Type<br>(e.g. Gd-enhancing, T2-hyperintense, T1-hypointense)                                                                                   | Gd-enhancing                                                                                                                                                                       |
| Analysis method                                                                                                                                | Manual identification                                                                                                                                                              |
| Analysis software                                                                                                                              | Automated in-house lesion growing algorithm                                                                                                                                        |
| Output measure<br>(e.g. count or volume [ml])                                                                                                  | Voxel fraction of lesion % and mL                                                                                                                                                  |
| <b>Tissue volumes</b>                                                                                                                          |                                                                                                                                                                                    |
| Type<br>(e.g. whole brain, grey matter, white matter, spinal cord)                                                                             | Primarily white matter                                                                                                                                                             |
| Analysis method                                                                                                                                | Segmentation                                                                                                                                                                       |
| Analysis software                                                                                                                              | Automated in-house segmentation                                                                                                                                                    |
| Output measure<br>(e.g. absolute tissue volume in ml, tissue volume as a fraction of intracranial volume, percentage change in tissue volumes) | Voxel fractions of white matter, grey matter and CSF (%)                                                                                                                           |
| <b>Tissue measures (e.g. MTR, DTI, T1-RT, T2-RT, T2*, T2', <sup>1</sup>H-MRS, perfusion, Na)</b>                                               |                                                                                                                                                                                    |
| Type<br>(e.g. whole brain, grey matter, white matter, spinal cord, normal-appearing grey matter or white matter)                               | <sup>1</sup> H-MRS                                                                                                                                                                 |
| Analysis method                                                                                                                                | Basis-set fitting                                                                                                                                                                  |
| Analysis software                                                                                                                              | LCModel version 6.3 followed by in-house scaling calculation                                                                                                                       |
| Output measure                                                                                                                                 | Absolute metabolite concentrations (mM) of:<br>N-acetyl-aspartate (NAA)<br>Total creatine (tCr)<br>Total choline (tCho)<br>Myo-inositol (mI)<br>Glutamate (Glu)<br>Glutamine (Gln) |
| <b>Other MRI measures (e.g. functional MRI)</b>                                                                                                |                                                                                                                                                                                    |
| Type<br>(e.g. whole brain, grey matter, white matter, spinal cord, normal-appearing grey matter or white matter)                               |                                                                                                                                                                                    |
| Analysis method                                                                                                                                |                                                                                                                                                                                    |
| Analysis software                                                                                                                              |                                                                                                                                                                                    |
| Output measure                                                                                                                                 |                                                                                                                                                                                    |

**Other analysis details:** none
