# Supplementary material for: Magnetic resonance spectroscopy evidence for declining gliosis in MS patients treated with ocrelizumab versus interferon beta-1a
Source: PubMed Central journal article supplement — Mult Scler J Exp Transl Clin. 2019 Oct 15;5(4):2055217319879952. doi: 10.1177/2055217319879952 (PMC6796216; doi:10.1177/2055217319879952), 2019-10-15
Supplement: MSO879952_Supplemental_Material2.pdf [file MSO879952_Supplemental_Material2.pdf]

To ensure that the lower number of subjects who had baseline scans as compared to the number of subjects who had follow-up scans did not affect the overall results of this study, all analyses were also conducted on the subset of patients who had a baseline and at least one follow up scan. All healthy controls had data from baseline and weeks 48, and 96, so there was no change in the results from this cohort. The percent changes with time, time x treatment interaction p values, and ANOVA p values for both the full data set and the subset of subjects that had baseline scans are listed in the table below. The results listed below are very similar to those given in Table 3 in the body of the article.

Supplemental Table 1. Comparison of full study results with the subset of MS subjects who had baseline plus at least one follow up scan. p values less than 0.05 are highlighted in bold.

| Metabolite | Data Subset in Analysis | Relapsing MS Patients  |                            |                                  | ANOVA Between Cohorts (p) |
|------------|-------------------------|------------------------|----------------------------|----------------------------------|---------------------------|
|            |                         | Ocrelizumab Treated    | Interferon Beta-1a Treated | Time x Treatment Interaction (p) |                           |
| NAA/tCr    | Full                    | 4.4 (0.8 to 8.1) %     | -1.3 (-5.2 to 2.5) %       | <b>0.04</b>                      | 0.09                      |
|            | With Baseline           | 4.4 (0.7 to 8.1) %     | -1.3 (-5.2 to 2.5) %       | 0.06                             | 0.10                      |
| NAA        | Full                    | 3.9 (-0.5 to 8.3) %    | 1.8 (-2.8 to 6.4) %        | 0.45                             | 0.44                      |
|            | With Baseline           | 3.9 (-0.4 to 8.2) %    | 1.8 (-2.7 to 6.3) %        | 0.26                             | 0.34                      |
| tCr        | Full                    | -0.3 (-4.5 to 4.0) %   | 3.6 (-0.8 to 8.0) %        | 0.06                             | 0.12                      |
|            | With Baseline           | -0.3 (-4.3 to 3.8) %   | 3.6 (-0.6 to 7.9) %        | <b>0.05</b>                      | 0.07                      |
| mI         | Full                    | -6.0 (-12.2 to 0.3) %  | 5.9 (-0.6 to 12.5) %       | 0.06                             | <b>0.03</b>               |
|            | With Baseline           | -6.0 (-11.8 to -0.09)% | 5.9 (-0.2 to 12.1)%        | <b>0.04</b>                      | <b>0.01</b>               |
| tCho       | Full                    | 0.1 (-5.2 to 5.4) %    | 4.6 (-0.9 to 10.1) %       | 0.17                             | 0.17                      |
|            | With Baseline           | 0.1 (-5.1 to 5.2)%     | 4.6 (-0.8 to 10.0)%        | 0.14                             | 0.11                      |
